# Supplementary material for: Experimental and theoretical insights into the formation of weak hydrogen bonds and H⋯H bonding interactions in the solid-state structure of two eucalyptol derivatives
Source: Royal Society of Chemistry journal article supplement (doi:10.1039/d2nj00428c), 2022-01-01
Supplement: d2nj00428c1.pdf [file d2nj00428c1.pdf]

## Electronic Supplementary Information (ESI).

### Experimental and theoretical insights on the formation of weak hydrogen bonds and dihydrogen interactions in the solid-state structure of two eucalyptol derivatives.

Carolina E. Galvez<sup>1</sup>, Oscar E. Piro<sup>2,+</sup>, Gustavo A. Echeverría<sup>2,+</sup>, Norma Lis Robles<sup>3,+</sup>, José O. G. Lezama<sup>4</sup>, Sankaran Venkatachalam Sankaran<sup>5</sup>, Subbiah Thamotharan<sup>5</sup>, Margarita B. Villecco<sup>1</sup>, María del H. Loandos<sup>1</sup>, Diego M. Gil<sup>4,+,\*</sup>

<sup>1</sup> Cátedra de Química Orgánica II. Instituto de Química Orgánica. Facultad de Bioquímica, Química y Farmacia. Universidad Nacional de Tucumán. Ayacucho 471. T4000INI. San Miguel de Tucumán. Argentina.

<sup>2</sup> Departamento de Física, Facultad de Ciencias Exactas, Universidad Nacional de La Plata e IFLP (CONICET, CCT-La Plata), C.C. 67, 1900, La Plata, Argentina.

<sup>3</sup> INQUINOA (CONICET – UNT). Facultad de Ciencias Exactas y Tecnología. Universidad Nacional de Tucumán. Av. Independencia 1800. CP 4000. San Miguel de Tucumán. Argentina.

<sup>4</sup> INBIOFAL (CONICET – UNT). Instituto de Química Orgánica. Facultad de Bioquímica, Química y Farmacia. Universidad Nacional de Tucumán. Ayacucho 471. T4000INI. San Miguel de Tucumán. Argentina.

<sup>5</sup> Biomolecular Crystallography laboratory, Department of Bioinformatics, School of Chemical and Biotechnology, SASTRA Deemed University, Thanjavur 613 401, India.

**Figure S1.** Optimized molecular structures of compounds **4** (a) and **6** (b) at the B3LYP/6-311++G(d,p) level of theory.

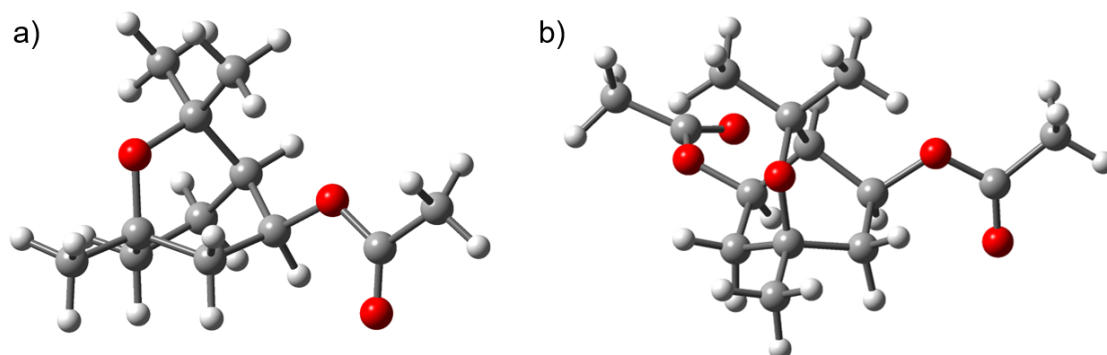

**Figure S2.** Full and decomposed two-dimensional fingerprint plots for **4**.

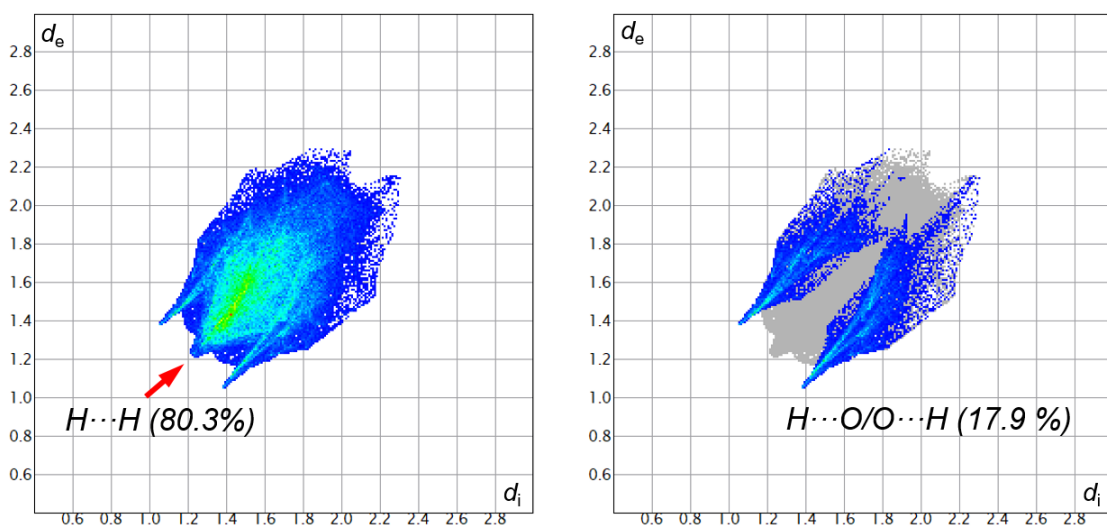

**Figure S3.** Full and decomposed two-dimensional fingerprint plots for **6**.

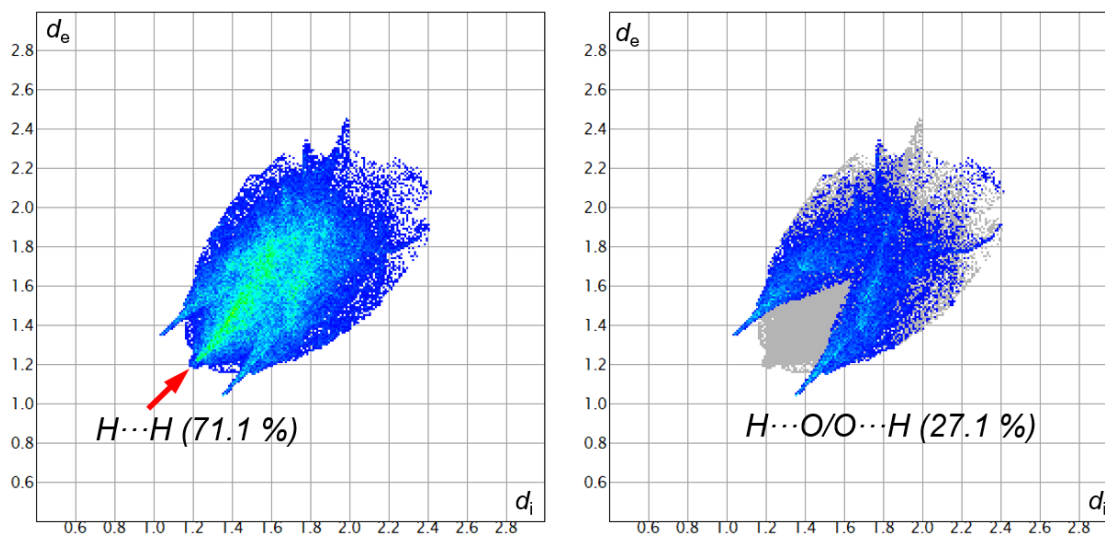

**Figure S4.** Combined QTAIM/NCI plot (0.5 a.u. isosurface) analysis for dimer D2 of compound **4**. The bond critical points are represented as red spheres.

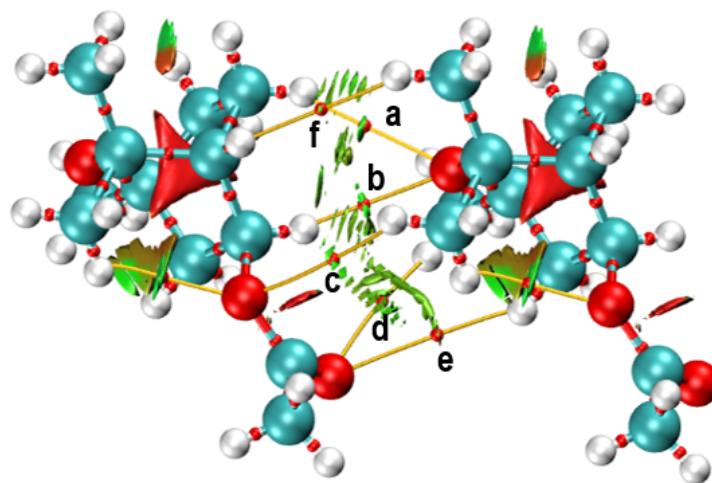

$$\Delta E_3 = -8.81 \text{ kcal/mol}$$

**Figure S5.** Experimental (black line) and calculated [B3LYP/6-311++G(d,p)] (red line) IR spectra of **4**.

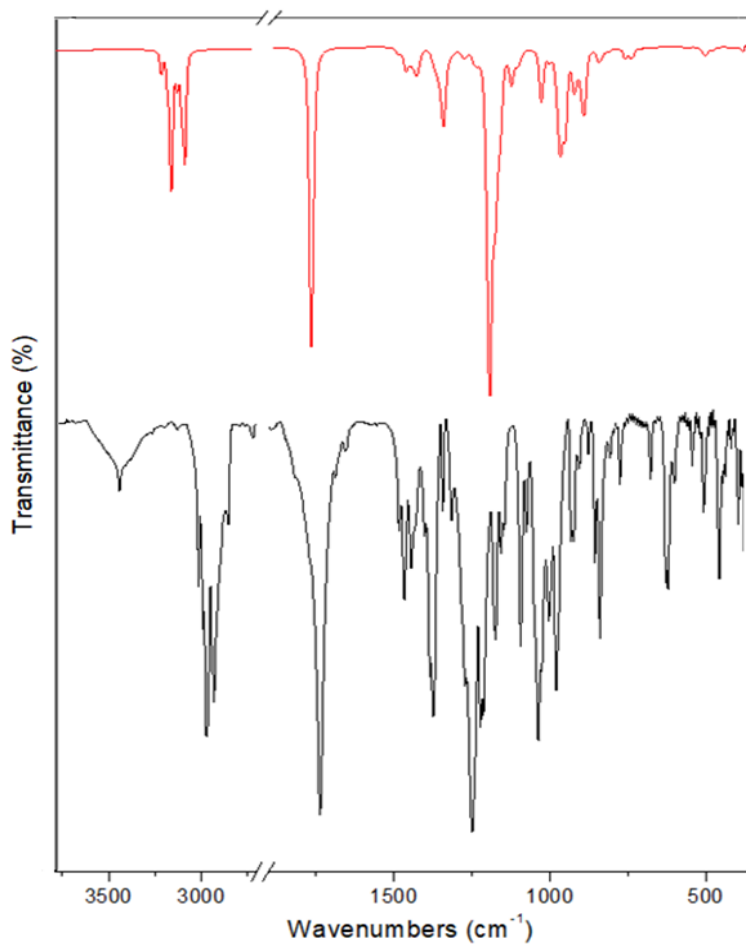

**Figure S6.** Experimental (black line) and calculated [B3LYP/6-311++G(d,p)] (red line) IR spectra of **6**.

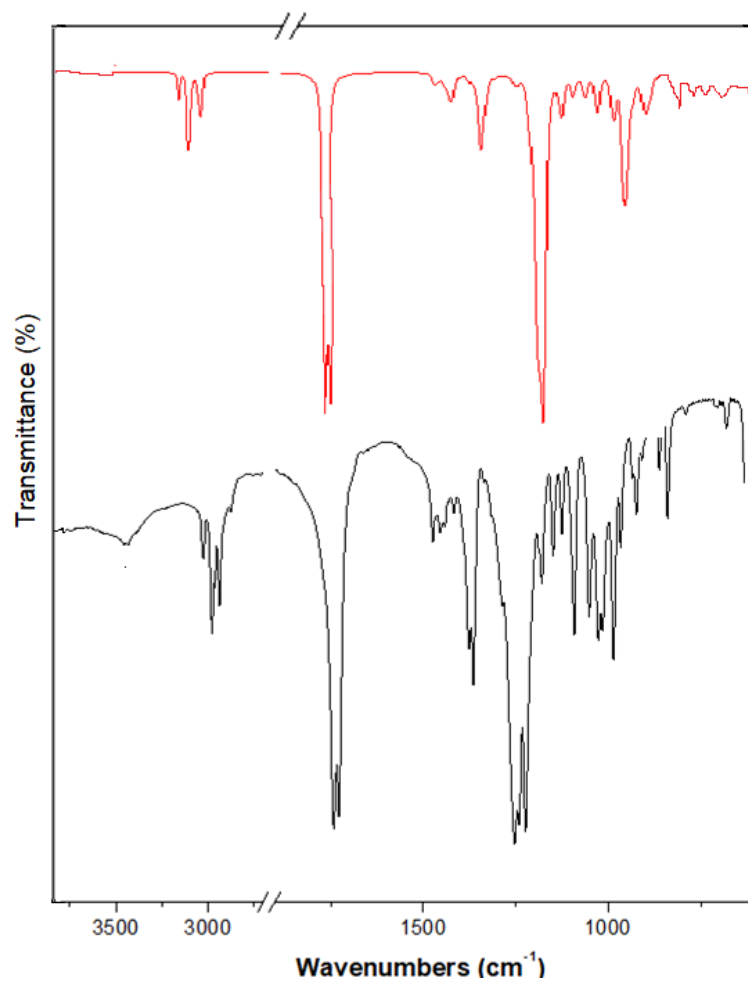

**Figure S7.** Experimental (black line) and calculated [B3LYP/6-311++G(d,p)] (red line) Raman spectra of 4.

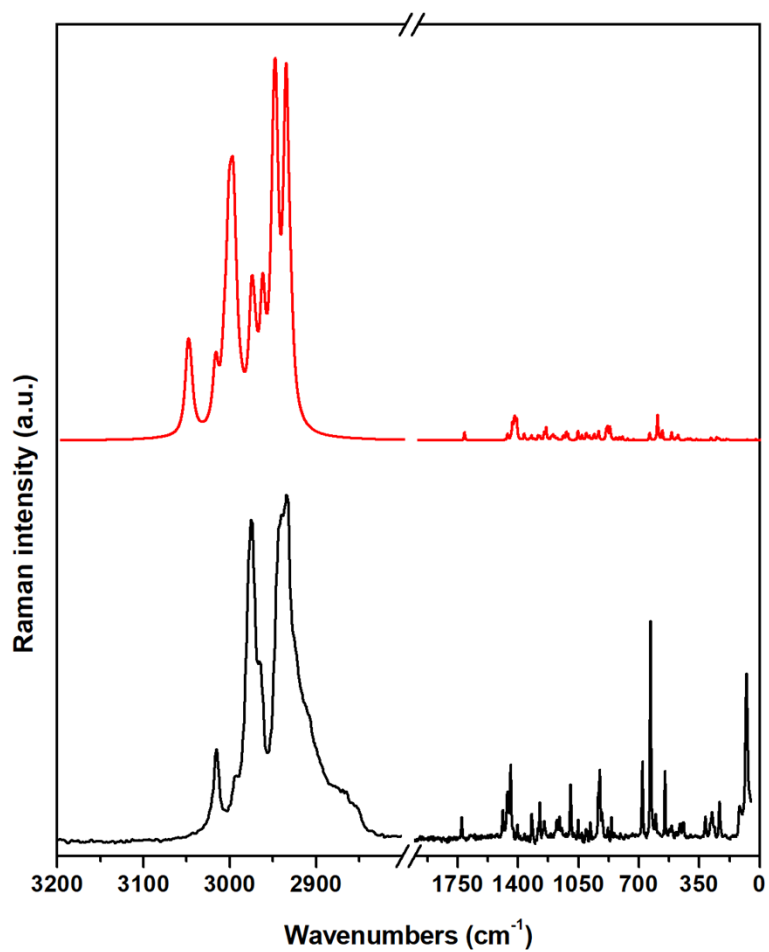

**Figure S8.** Experimental (black line) and calculated [B3LYP/6-311++G(d,p)] (red line) Raman spectra of **6**.

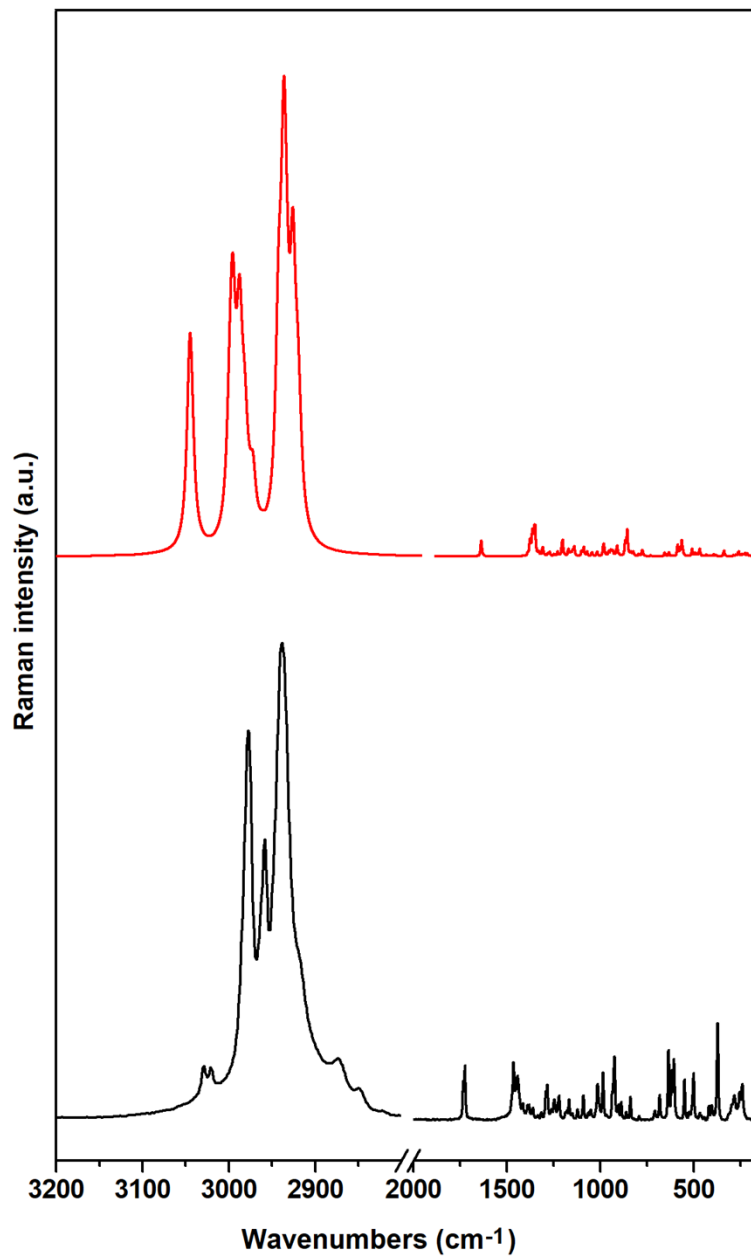

**Figure S9.** Experimental  $^1\text{H}$  NMR spectrum of compound **4** in  $\text{CDCl}_3$ .

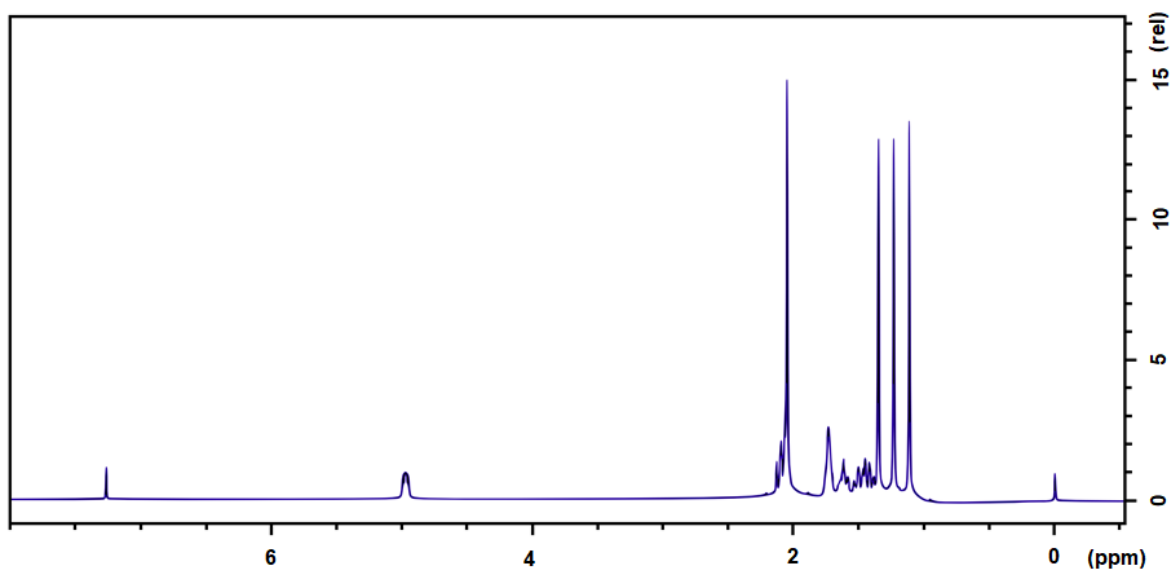

**Figure S10.** Experimental  $^1\text{H}$  NMR spectrum of compound **6** in  $\text{CDCl}_3$ .

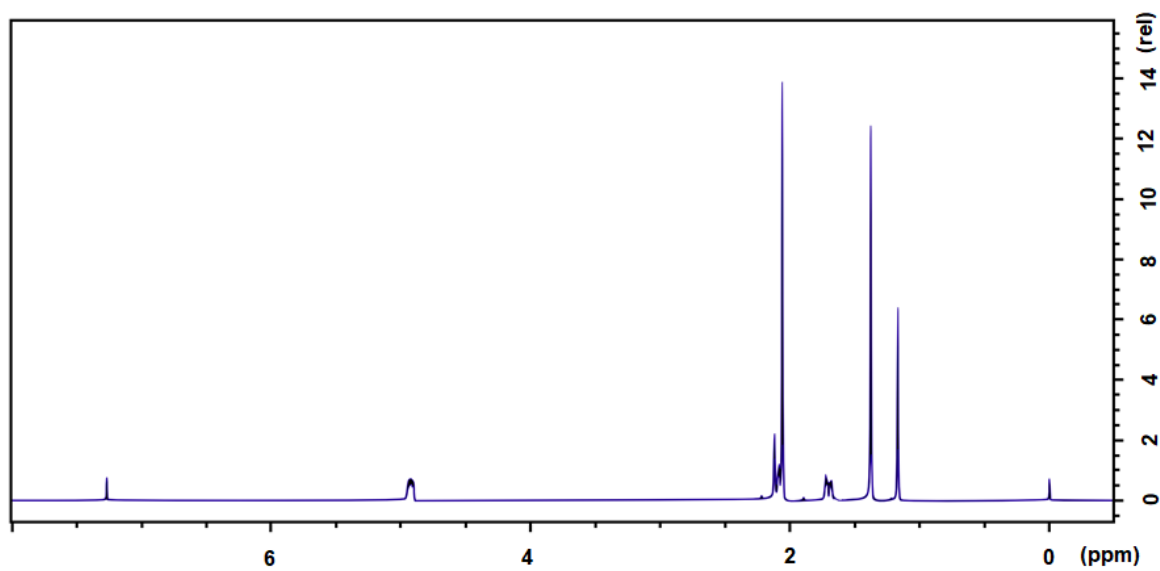



**Figure S11.** Experimental  $^{13}\text{C}$  NMR spectrum of compound **4** in  $\text{CDCl}_3$ .

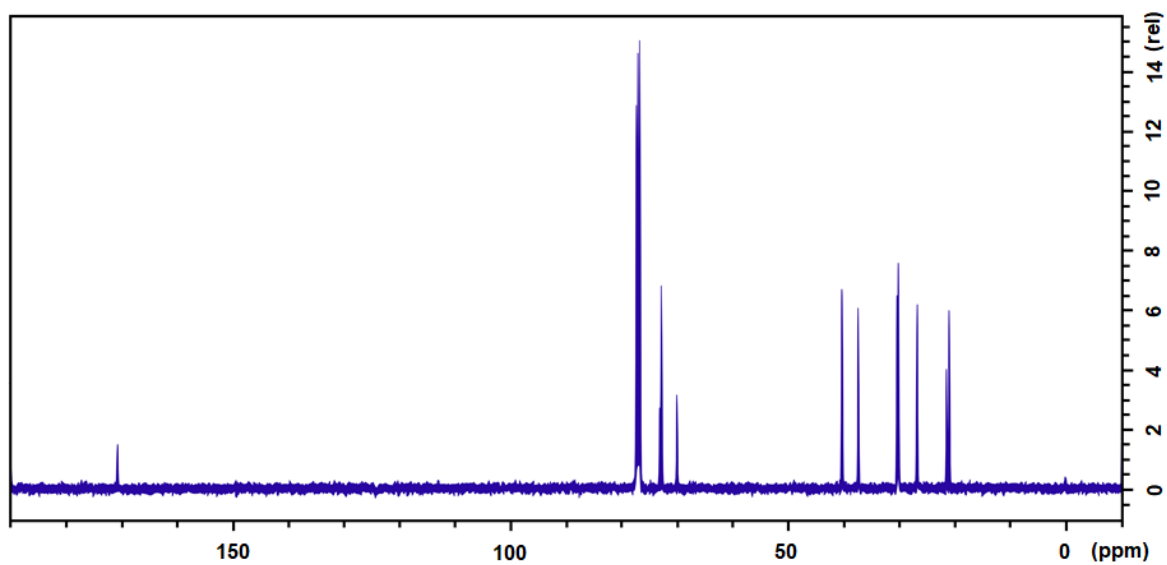

**Figure S12.** Experimental  $^{13}\text{C}$  NMR spectrum of compound **6** in  $\text{CDCl}_3$ .

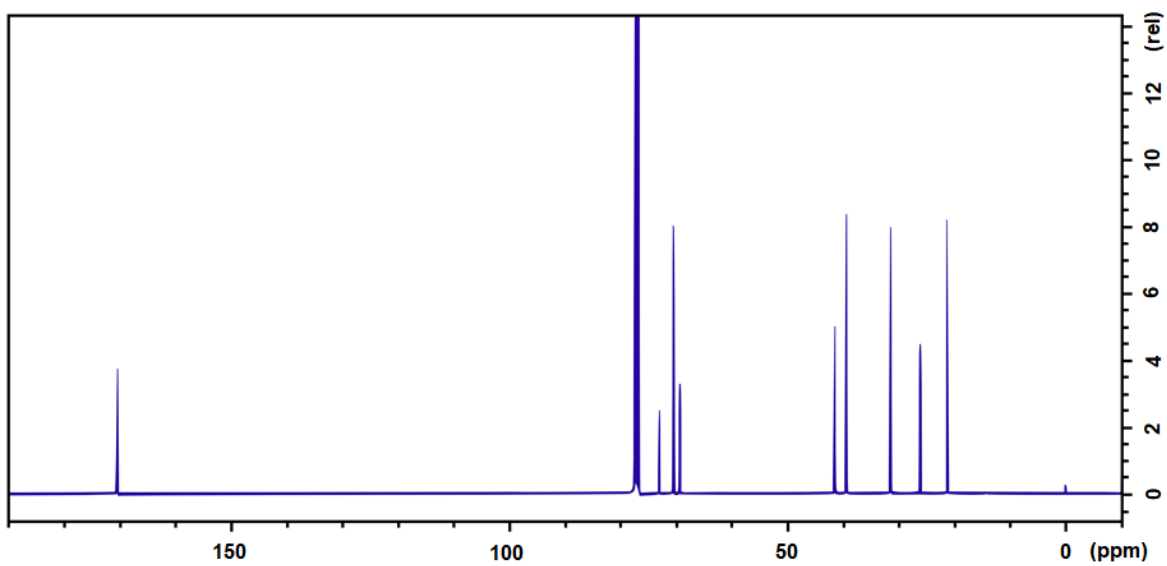

**Figure S13.** Experimental 2D ( $^1\text{H}$ - $^1\text{H}$ ) COSY NMR spectrum of compound **4** in  $\text{CDCl}_3$

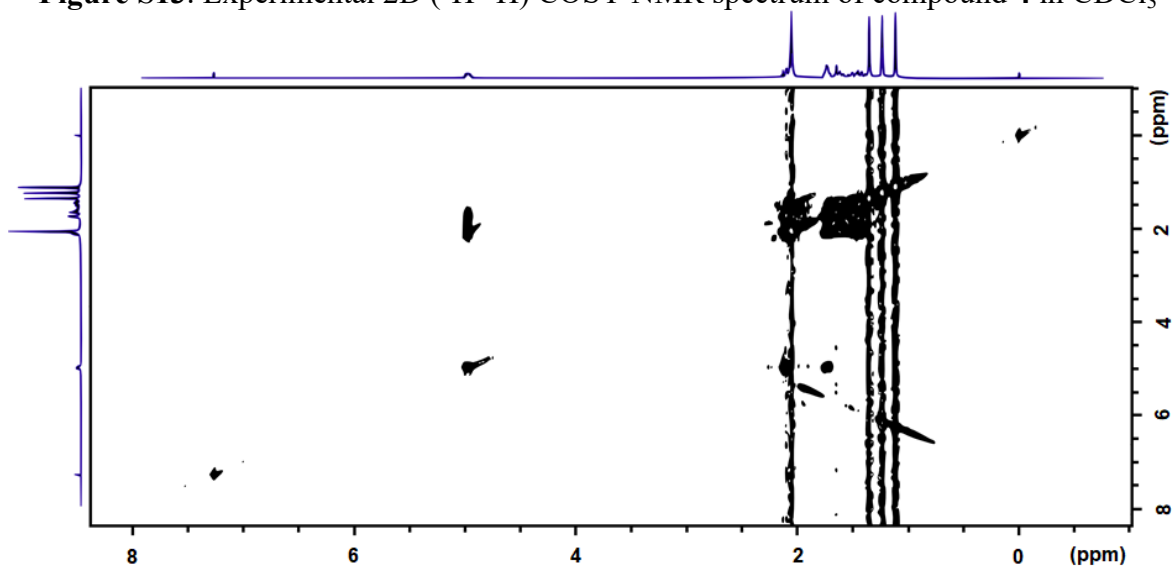

**Figure S14.** Experimental 2D ( $^1\text{H}$ - $^1\text{H}$ ) COSY NMR spectrum of compound **6** in  $\text{CDCl}_3$ .

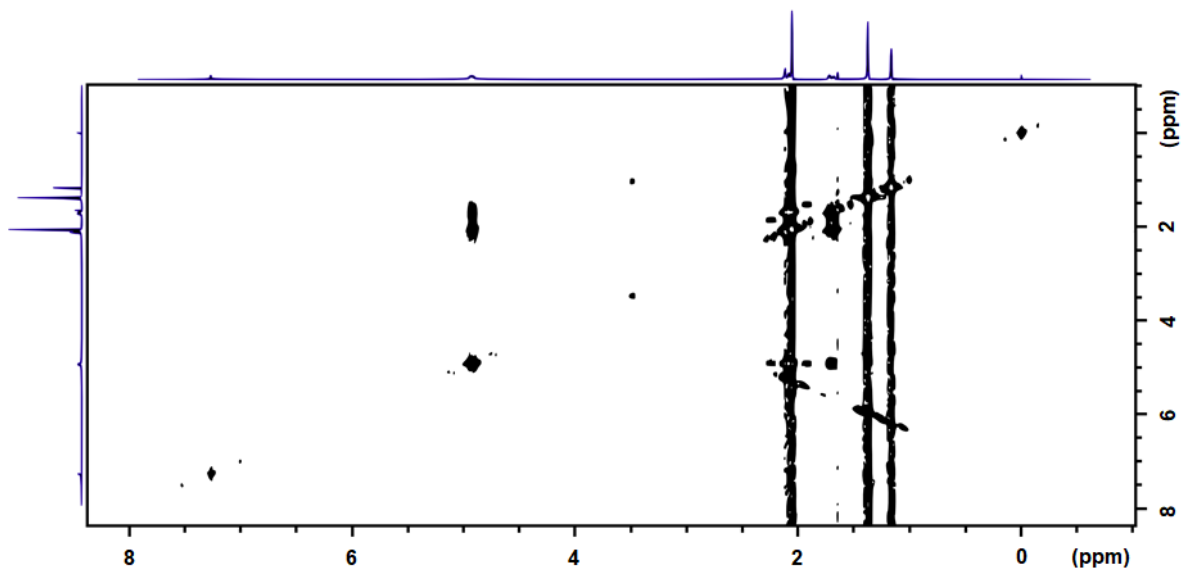

**Figure S15.** Experimental 2D ( $^1\text{H}$ - $^{13}\text{C}$ ) HSQC NMR spectrum of compound **4** in  $\text{CDCl}_3$ .

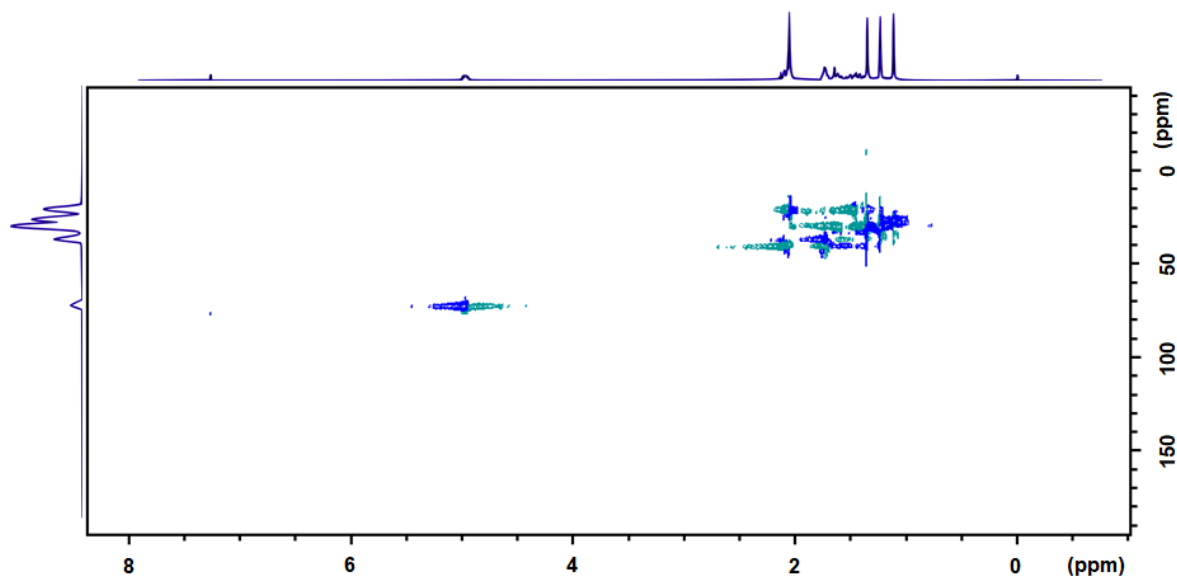

**Fig. S16.** Experimental 2D ( $^1\text{H}$ - $^{13}\text{C}$ ) HSQC NMR spectrum of compound **6** in  $\text{CDCl}_3$ .

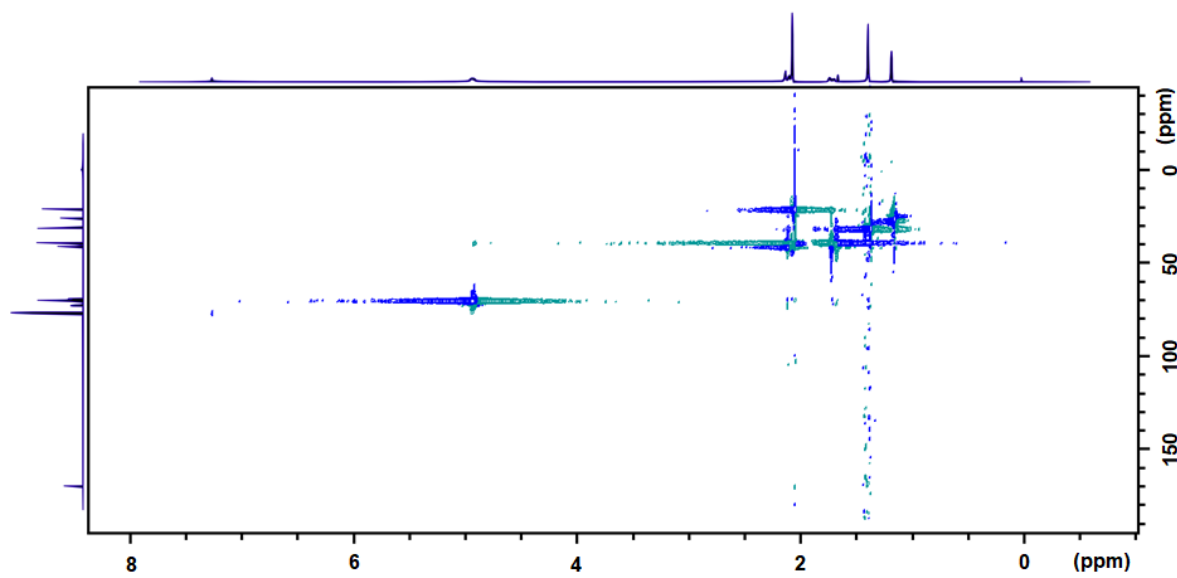

**Figure S17.** Experimental 2D ( $^1\text{H}$ - $^{13}\text{C}$ ) HMBC NMR spectrum of compound **4** in  $\text{CDCl}_3$ .

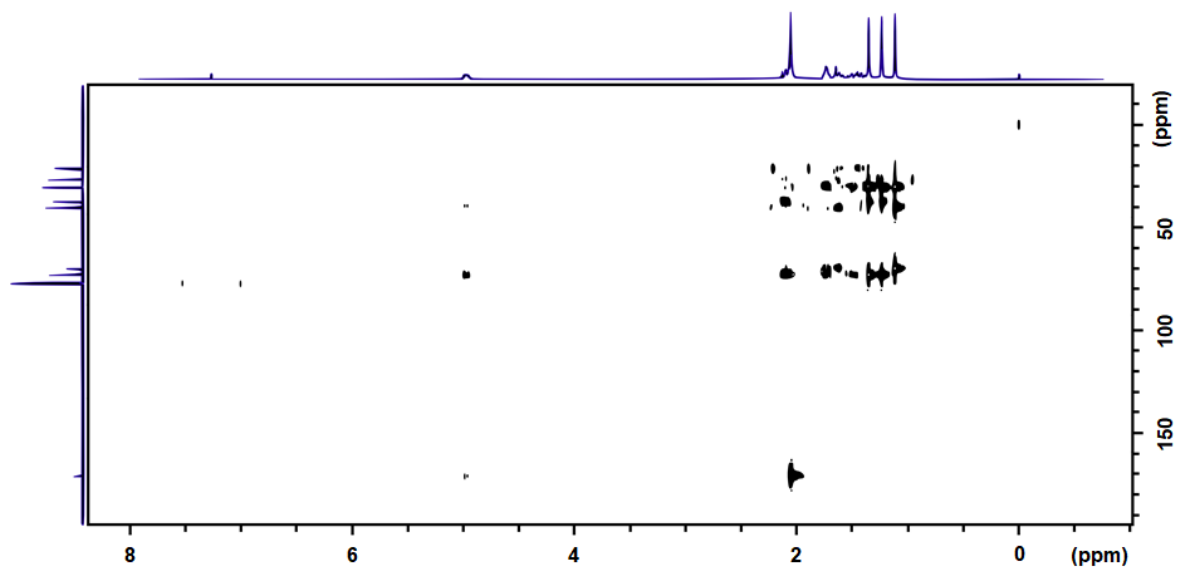

**Figure S18.** Experimental 2D ( $^1\text{H}$ - $^{13}\text{C}$ ) HMBC NMR spectrum of compound **6** in  $\text{CDCl}_3$ .

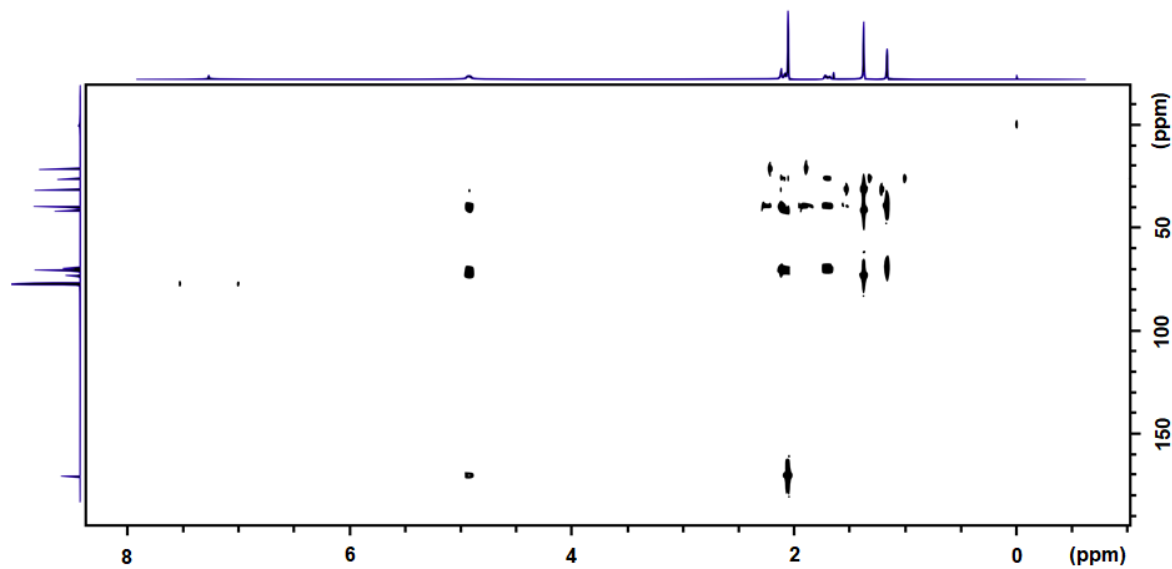

**Table S1:** Topological parameters<sup>a</sup> for intramolecular interactions observed in the structures of compounds **4** and **6**.

| CP <sup>b</sup>   | Interaction        | d(H $\cdots$ O) <sup>b</sup> | $\rho(r)$ | $\nabla^2(\rho)$ | G(r)   | H(r)    | V(r)    | V/G  | DE <sup>c</sup> |
|-------------------|--------------------|------------------------------|-----------|------------------|--------|---------|---------|------|-----------------|
| <b>Compound 4</b> |                    |                              |           |                  |        |         |         |      |                 |
| 1                 | C9-H9C $\cdots$ O2 | 2.405                        | 0.0121    | 0.0545           | 0.0108 | -0.0023 | -0.0085 | 0.79 | 2.91            |
| <b>Compound 6</b> |                    |                              |           |                  |        |         |         |      |                 |
| 1                 | C9-H9C $\cdots$ O2 | 2.295                        | 0.0144    | 0.0622           | 0.0129 | -0.0026 | -0.0104 | 0.81 | 3.47            |
| 2                 | C9-H8A $\cdots$ O4 | 2.339                        | 0.0136    | 0.0572           | 0.0119 | -0.0024 | -0.0095 | 0.80 | 3.20            |

<sup>a</sup>  $\rho$ : electron density(a.u.),  $\nabla^2(\rho)$ : Laplacian of electron density (a.u.), G: Kinetic energy density (a.u.), H: Total electronic density (a.u.), V: potential energy density (a.u.).

<sup>b</sup> See Fig. 5 for labels of CPs.

<sup>c</sup> DE: dissociation energy (kcal/mol) computed with the formula [DE = 0.429 x G(r)].

**Table S2.** Experimental and calculated wavenumbers of compound **4** monomer and tentative assignment of fundamental vibrational modes.

| Mode N <sup>o</sup> | Approximate description <sup>a</sup>                           | Experimental <sup>b</sup> |               | B3LYP/6-311++G(d,p) <sup>c</sup> |        |         |            |
|---------------------|----------------------------------------------------------------|---------------------------|---------------|----------------------------------|--------|---------|------------|
|                     |                                                                | IR (solid)                | Raman (solid) | Unscaled                         | Scaled | Int. IR | Act. Raman |
|                     | $\nu$ O $\cdots$ H dimer                                       | 3442 m                    | -             |                                  |        |         |            |
| 1                   | $\nu_{as}$ C(12)H <sub>3</sub>                                 | -                         | -             | 3154                             | 3028   | 3       | 30         |
| 2                   | $\nu_{as}$ C(9)H <sub>3</sub>                                  | 3014 m                    | 3016 m        | 3151                             | 3025   | 6       | 18         |
| 3                   | $\nu_{as}$ C(8)H <sub>3</sub> + $\nu_{as}$ C(5)H <sub>2</sub>  | 2991 m                    | 2993 sh       | 3121                             | 2996   | 11      | 26         |
| 4                   | $\nu_{as}$ C(12)H <sub>3</sub>                                 | -                         | -             | 3111                             | 2986   | 2       | 20         |
| 5                   | $\nu_{as}$ C(10)H <sub>3</sub>                                 | -                         | -             | 3106                             | 2982   | 17      | 35         |
| 6                   | $\nu_{as}$ C(10)H <sub>3</sub> + $\nu_{as}$ C(2)H <sub>2</sub> | 2973 s                    | 2975 s        | 3105                             | 2981   | 18      | 31         |
| 7                   | $\nu_{as}$ C(8)H <sub>3</sub> + $\nu_{as}$ C(5)H <sub>2</sub>  | -                         | -             | 3102                             | 2978   | 3       | 24         |
| 8                   | $\nu_{as}$ C(8)H <sub>3</sub> + $\nu_{as}$ C(9)H <sub>3</sub>  | 2964 sh                   | 2965 sh       | 3100                             | 2976   | 14      | 56         |
| 9                   | $\nu$ C(3)H + $\nu_{as}$ C(2)H <sub>2</sub>                    | -                         | -             | 3096                             | 2972   | 1       | 16         |
| 10                  | $\nu_s$ C(2)H <sub>2</sub>                                     | -                         | -             | 3090                             | 2966   | 1       | 4          |
| 11                  | $\nu$ C(4)H + $\nu$ C(3)H                                      | -                         | -             | 3078                             | 2955   | 6       | 46         |
| 12                  | $\nu_{as}$ C(6)H <sub>2</sub> + $\nu_{as}$ C(5)H <sub>2</sub>  | -                         | -             | 3074                             | 2951   | 3       | 18         |
| 13                  | $\nu$ C(3)H + $\nu$ C(4)H                                      | 2941 m                    | 2941 sh       | 3065                             | 2942   | 5       | 48         |
| 14                  | $\nu_s$ C(2)H <sub>2</sub> + $\nu_s$ C(6)H <sub>2</sub>        | 2931 m                    | 2934 m        | 3052                             | 2930   | 8       | 67         |
| 15                  | $\nu_s$ C(12)H <sub>3</sub>                                    | -                         | -             | 3049                             | 2927   | 1       | 64         |
| 16                  | $\nu_s$ C(5)H <sub>2</sub> + $\nu_s$ C(6)H <sub>2</sub>        | -                         | -             | 3048                             | 2926   | 13      | 32         |
| 17                  | $\nu_s$ C(9)H <sub>3</sub> + $\nu_s$ C(8)H <sub>3</sub>        | 2912 sh                   | 2912 sh       | 3037                             | 2916   | 11      | 100        |
| 18                  | $\nu_s$ C(10)H <sub>3</sub> + $\nu_s$ C(6)H <sub>2</sub>       | 2896 sh                   | 2896 sh       | 3036                             | 2914   | 16      | 37         |
| 19                  | $\nu_s$ C(6)H <sub>3</sub> + $\nu_s$ C(10)H <sub>2</sub>       | -                         | -             | 3031                             | 2910   | 1       | 21         |
| 20                  | $\nu_s$ C(8)H <sub>3</sub> + $\nu_s$ C(9)H <sub>3</sub>        | 2854 m                    | 2854 sh       | 3030                             | 2909   | 4       | 5          |
|                     | Fermi resonance                                                | 2720 w                    | 2722 w        |                                  |        |         |            |
| 21                  | $\nu$ C(11)O(3)                                                | 1737 vs                   | 1726 w        | 1786                             | 1714   | 100     | 3          |
| 22                  | $\delta$ C(5)H <sub>2</sub> + $\delta_{as}$ C(8)H <sub>3</sub> | 1483 m                    | 1488 w        | 1529                             | 1468   | 2       | 2          |

|    |                                               |         |         |      |      |    |    |
|----|-----------------------------------------------|---------|---------|------|------|----|----|
| 23 | $\delta_{as} C(9)H_3 + \delta_{as} C(8)H_3$   | 1466 m  | 1460 m  | 1509 | 1449 | 6  | 1  |
| 24 | $\delta_{as} C(10)H_3$                        | 1444 m  | 1443 m  | 1500 | 1440 | 1  | 2  |
| 25 | $\delta_{as} C(8)H_3 + \delta_{as} C(9)H_3$   | -       | -       | 1498 | 1438 | <1 | 2  |
| 26 | $\delta C(6)H_2 + \delta_{as} C(9)H_3$        | -       | -       | 1492 | 1432 | 1  | 1  |
| 27 | $\delta C(2)H_2 + \delta_{as} C(10)H_3$       | 1432 sh | 1427 sh | 1488 | 1428 | 4  | 3  |
| 28 | $\delta C(5)H_2 + \delta_{as} C(8)H_3$        | -       | -       | 1485 | 1426 | <1 | 4  |
| 29 | $\omega C(10)H_3 + \delta C(2)H_2$            | -       | -       | 1478 | 1419 | <1 | <1 |
| 30 | $\delta_{as} C(12)H_3$                        | 1402 m  | 1404 w  | 1478 | 1418 | 4  | 3  |
| 31 | $\omega C(8)H_3 + \omega C(9)H_3$             | -       | -       | 1474 | 1415 | 1  | 2  |
| 32 | $\omega C(12)H_3$                             | -       | -       | 1471 | 1412 | 5  | 2  |
| 33 | $\delta C(3)H$                                | -       | -       | 1429 | 1372 | 2  | 2  |
| 34 | $\delta_s C(8)H_3 + \delta_s C(9)H_3$         | -       | -       | 1421 | 1364 | 4  | <1 |
| 35 | $\delta_s C(10)H_3$                           | -       | -       | 1410 | 1354 | 5  | <1 |
| 36 | $\delta C(4)H + \delta C(5)H_2$               | -       | -       | 1400 | 1344 | 7  | <1 |
| 37 | $\delta_s C(8)H_3 + \delta_s C(9)H_3$         | 1385 s  | 1387 vw | 1397 | 1341 | 18 | <1 |
| 38 | $\delta_s C(12)H_3$                           | 1374 vs | -       | 1385 | 1330 | 3  | 2  |
| 39 | $\delta C(3)H + \omega C(2)H_2$               | 1360 sh | 1361 w  | 1369 | 1314 | 1  | <1 |
| 40 | $\omega C(5)H_2 + \delta C(4)H$               | 1344 m  | 1343 vw | 1346 | 1292 | <1 | 1  |
| 41 | $\omega C(2)H_2 + \delta C(3)H$               | -       | -       | 1335 | 1282 | 3  | 1  |
| 42 | $\delta C(6)H_2 + \delta C(4)H$               | 1315 m  | 1320 m  | 1309 | 1257 | 2  | 2  |
| 43 | $\tau\omega C(6)H_2 + \tau\omega C(5)H_2$     | -       | -       | 1297 | 1245 | 4  | 3  |
| 44 | $\tau\omega C(2)H_2$                          | 1284 sh | 1284 w  | 1268 | 1217 | 11 | 1  |
| 45 | $\omega C(12)H_3 + \nu C(11)O(2)$             | 1272 m  | 1273 m  | 1262 | 1212 | 87 | <1 |
| 46 | $\nu C(11)O(2) + \nu CC \text{ ring}$         | 1249 vs | 1248 w  | 1256 | 1206 | 24 | 1  |
| 47 | $\nu C(3)O(2) + \nu CC \text{ ring}$          | 1223 s  | -       | 1246 | 1196 | 42 | 1  |
| 48 | $\nu CC \text{ ring}$                         | 1214 s  | 1212 vw | 1232 | 1183 | 34 | 1  |
| 49 | $\nu C-CH_3$                                  | -       | -       | 1198 | 1150 | 5  | <1 |
| 50 | $\nu C-CH_3$                                  | -       | -       | 1194 | 1146 | 6  | 1  |
| 51 | $\nu C-CH_3$                                  | 1174 m  | 1175 w  | 1176 | 1129 | 6  | 2  |
| 52 | $\nu CC \text{ ring}$                         | 1157 m  | 1160 w  | 1167 | 1120 | 1  | 2  |
| 53 | $\nu CCC$                                     | 1147 m  | 1145 w  | 1107 | 1063 | 16 | 2  |
| 54 | $\nu_{as} C(1)O(1)C(7)$                       | 1095 m  | 1095 m  | 1084 | 1041 | 3  | 1  |
| 55 | $\delta C(12)C(11)O3$                         | 1075 m  | 1076 vw | 1065 | 1022 | 2  | <1 |
| 56 | $\nu CC \text{ ring}$                         | -       | -       | 1057 | 1015 | 12 | 2  |
| 57 | $\nu C(3)O(2)$                                | 1049 sh | 1052 w  | 1050 | 1008 | 23 | <1 |
| 58 | $\nu CC \text{ ring} + \nu C(11)O(2)$         | 1038 s  | 1040 vw | 1038 | 996  | 28 | 1  |
| 59 | $\tau\omega C(8)H_3 + \tau\omega C(9)H_3$     | 1027 m  | 1028 w  | 1014 | 973  | 1  | 1  |
| 60 | $\nu CC \text{ ring} + \omega C(10)H_3$       | 1005 m  | 1005 w  | 1009 | 969  | 14 | 1  |
| 61 | $\rho C(10)H_3 + \rho C(2)H_2$                | 980 s   | 980 w   | 992  | 952  | 5  | 1  |
| 62 | $\nu CC \text{ ring} + \nu_{as} C(1)O(1)C(7)$ | 974 sh  | 975 sh  | 982  | 943  | 23 | 2  |
| 63 | $\rho C(8)H_3 + \rho C(9)H_3$                 | 933 m   | 935 m   | 938  | 900  | 4  | 2  |
| 64 | $\rho C(9)H_3 + \rho C(8)H_3$                 | -       | -       | 932  | 895  | <1 | 1  |

|    |                                                       |       |        |     |     |    |    |
|----|-------------------------------------------------------|-------|--------|-----|-----|----|----|
| 65 | $\delta$ CCH ring                                     | 923 m | 925 m  | 928 | 891 | 2  | 2  |
| 66 | $\delta$ CCH ring                                     | -     | 915 w  | 915 | 878 | <1 | 3  |
| 67 | $\rho$ C(10)H <sub>3</sub> + $\nu$ CC ring            | 907 w | 909 sh | 910 | 874 | 1  | 1  |
| 68 | $\nu$ CCC                                             | 878 w | 879 w  | 880 | 845 | 1  | 1  |
| 69 | $\rho$ C(2)H <sub>2</sub> + $\rho$ C(6)H <sub>2</sub> | 857 m | 860 w  | 859 | 825 | 3  | 1  |
| 70 | $\rho$ C(6)H <sub>2</sub> + $\rho$ C(2)H <sub>2</sub> | 840 m | 843 vw | 840 | 806 | 5  | 1  |
| 71 | $\nu_s$ C(1)O(1)C(7)                                  | 808 w | 809 vw | 811 | 779 | <1 | <1 |
| 72 | $\nu$ CCC ring                                        | 777 w | -      | 776 | 745 | <1 | <1 |
| 73 | $\delta$ CCH ring + $\nu_s$ C(1)O(1)C(7)              | 679 w | 680 m  | 678 | 651 | <1 | 2  |
| 74 | $\delta$ O(2)C(11)O(3)                                | 632 m | 630 s  | 630 | 605 | 1  | 6  |
| 75 | $\omega$ C(11)O(3)                                    | 622 m | -      | 622 | 597 | 2  | <1 |
| 76 | $\rho$ C(12)H <sub>3</sub>                            | 601 w | 603 w  | 601 | 577 | 1  | 2  |
| 77 | $\delta$ C(10)C(1)O(1)                                | 545 w | 548 m  | 546 | 524 | <1 | 2  |
| 78 | $\delta$ O(2)C(11)O(3)                                | 518 w | 522 vw | 522 | 501 | <1 | <1 |
| 79 | $\delta$ C(8)C(7)C(9) ring + $\delta$ CCO ring        | 508 m | 511 w  | 508 | 488 | 1  | 1  |
| 80 | $\delta$ CCO ring                                     | 459 m | 463 w  | 462 | 444 | 4  | <1 |
| 81 | $\delta$ CCC ring                                     | 448 w | 447 w  | 448 | 430 | <1 | <1 |
| 82 | $\delta$ CCCH <sub>2</sub>                            | 440 w | 440 w  | 433 | 416 | <1 | <1 |
| 83 | $\delta$ C(2)C(1)C(6)                                 | 421 w | -      | 401 | 385 | <1 | <1 |
| 84 | $\delta$ CCC ring                                     | 397 m | -      | 396 | 380 | 1  | <1 |
| 85 | $\delta$ C(5)C(4)C(7)                                 | 375 m | -      | 372 | 357 | <1 | <1 |
| 86 | $\tau$ CC ring                                        | -     | 316 w  | 310 | 298 | <1 | 1  |
| 87 | $\tau$ C(9)H <sub>3</sub>                             | -     | 275 w  | 276 | 265 | <1 | 1  |
| 88 | $\tau$ CH <sub>3</sub>                                | -     | 261 w  | 268 | 257 | <1 | <1 |
| 89 | $\tau$ CC ring                                        | -     | -      | 258 | 248 | <1 | <1 |
| 90 | $\tau$ CH <sub>3</sub>                                | -     | 232 w  | 238 | 228 | <1 | <1 |
| 91 | $\tau$ C(8)H <sub>3</sub>                             | -     | -      | 219 | 210 | 1  | <1 |
| 92 | $\tau$ C(10)H <sub>3</sub>                            | -     | -      | 209 | 201 | <1 | <1 |
| 93 | $\tau$ CC ring                                        | -     | -      | 201 | 193 | <1 | <1 |
| 94 | $\tau$ CH <sub>3</sub>                                | -     | 116    | 181 | 174 | <1 | <1 |
| 95 | $\tau$ C(12)H <sub>3</sub>                            | -     | -      | 96  | 92  | 1  | <1 |
| 96 | $\tau$ skeletal                                       | -     | 76     | 89  | 85  | <1 | <1 |
| 97 | $\tau$ skeletal                                       | -     | -      | 56  | 54  | <1 | <1 |
| 98 | $\tau$ C(3)O(2)                                       | -     | -      | 43  | 41  | <1 | <1 |
| 99 | $\tau$ skeletal                                       | -     | -      | 11  | 11  | 1  | <1 |

<sup>a</sup> Main contributors to fundamental vibrational modes.  $\nu$ : stretching;  $\delta$ : bending;  $\rho$ : rocking;  $\omega$ : wagging;  $\tau\omega$ : twisting;  $\tau$ : torsional modes; s: symmetric; as: asymmetric.

<sup>b</sup> s: strong; vs: very strong; m: medium; w: weak; vw: very weak; sh: shoulder.

<sup>c</sup> Shaded columns show the best correlation with experimental frequencies observed. Higher frequency values were scaled with 0.9676 factor [Ref. 55]. Relative infrared intensities and Raman activities were normalized to 100%.

**Table S3.** Experimental and calculated wavenumbers of **6** monomer and tentative assignment of fundamental vibrational modes.

| Mode<br>N° | Approximate description <sup>a</sup>                                                                    | Experimental <sup>b</sup> |                  | B3LYP/6-311++G(d,p) <sup>c</sup> |        |         |            |
|------------|---------------------------------------------------------------------------------------------------------|---------------------------|------------------|----------------------------------|--------|---------|------------|
|            |                                                                                                         | IR<br>(solid)             | Raman<br>(solid) | unscaled                         | scaled | Int. IR | Act. Raman |
|            | $\nu$ O...H dimer                                                                                       | 3455 w                    | -                |                                  |        |         |            |
|            | $\nu$ O...H dimer                                                                                       | 3433 w                    | -                |                                  |        |         |            |
| 1          | $\nu_{as}$ C(9)H <sub>3</sub>                                                                           | -                         | -                | 3156                             | 3030   | 3       | 21         |
| 2          | $\nu_{as}$ C(14)H <sub>3</sub>                                                                          | 3029 m                    | 3029 w           | 3156                             | 3030   | 1       | 30         |
| 3          | $\nu_{as}$ C(12)H <sub>3</sub>                                                                          | 3021 m                    | 3021 w           | 3156                             | 3030   | 1       | 33         |
| 4          | $\nu_{as}$ C(8)H <sub>3</sub>                                                                           | -                         | -                | 3153                             | 3027   | 2       | 16         |
| 5          | $\nu_{as}$ C(12)H                                                                                       | -                         | -                | 3111                             | 2987   | 1       | 20         |
| 6          | $\nu_{as}$ C(14)H <sub>3</sub>                                                                          | -                         | -                | 3110                             | 2986   | 1       | 20         |
| 7          | $\nu_{as}$ C(10)H <sub>3</sub>                                                                          | -                         | -                | 3108                             | 2984   | 6       | 35         |
| 8          | $\nu_{as}$ C(10)H <sub>3</sub> + $\nu_{as}$ C(6)H <sub>2</sub> + $\nu_{as}$ C(2)H <sub>2</sub>          | 2977 s                    | 2977 s           | 3107                             | 2983   | 9       | 47         |
| 9          | $\nu_{as}$ C(10)H <sub>3</sub>                                                                          | -                         | -                | 3101                             | 2977   | 1       | 15         |
| 10         | $\nu_{as}$ C(8)H <sub>3</sub> + $\nu_{as}$ C(9)H <sub>3</sub>                                           | 2965 s                    | 2958 s           | 3100                             | 2976   | 9       | 62         |
| 11         | $\nu_{as}$ C(6)H <sub>2</sub> + $\nu_{as}$ C(2)H <sub>2</sub>                                           | -                         | -                | 3098                             | 2974   | 1       | 7          |
| 12         | $\nu$ C(4)H                                                                                             | -                         | -                | 3094                             | 2970   | 1       | 36         |
| 13         | $\nu_{as}$ C(8)H <sub>3</sub> + $\nu_{as}$ C(9)H <sub>3</sub>                                           | -                         | -                | 3090                             | 2966   | <1      | 5          |
| 14         | $\nu$ C(3)H + $\nu$ C(4)H + $\nu$ C(5)H                                                                 | -                         | -                | 3085                             | 2962   | 1       | 23         |
| 15         | $\nu$ C(3)H + $\nu$ C(5)H                                                                               | -                         | -                | 3074                             | 2951   | 1       | 2          |
| 16         | $\nu_s$ C(2)H <sub>2</sub> + $\nu_s$ C(6)H <sub>2</sub>                                                 | -                         | -                | 3056                             | 2934   | 4       | 75         |
| 17         | $\nu_s$ C(12)H <sub>3</sub>                                                                             | -                         | -                | 3050                             | 2928   | <1      | 71         |
| 18         | $\nu_s$ C(14)H <sub>3</sub>                                                                             | -                         | -                | 3050                             | 2928   | <1      | 72         |
| 19         | $\nu_s$ C(6)H <sub>2</sub> + $\nu_s$ C(2)H <sub>2</sub>                                                 | -                         | -                | 3047                             | 2925   | 4       | 34         |
| 20         | $\nu_s$ C(8)H <sub>3</sub> + $\nu_s$ C(9)H <sub>3</sub>                                                 | 2918 sh                   | 2919 sh          | 3040                             | 2918   | 8       | 100        |
| 21         | $\nu_s$ C(10)H <sub>3</sub>                                                                             | 2876 m                    | 2874 w           | 3034                             | 2913   | 3       | 42         |
| 22         | $\nu_s$ C(9)H <sub>3</sub> + $\nu_s$ C(8)H <sub>3</sub>                                                 | -                         | 2850 vw          | 3031                             | 2910   | 2       | 9          |
|            | Fermi resonance                                                                                         | 2710 vw                   | 2710 vw          |                                  |        |         |            |
| 23         | $\nu$ C(11)O(3)                                                                                         | 1741 vs                   | 1734 s           | 1791                             | 1719   | 74      | 4          |
| 24         | $\nu$ C(13)O(5)                                                                                         | 1728 vs                   | 1725 vs          | 1788                             | 1716   | 32      | 1          |
| 25         | $\delta_{as}$ C(9)H <sub>3</sub> + $\delta_{as}$ C(8)H <sub>3</sub>                                     | 1474 w                    | -                | 1516                             | 1455   | 4       | 1          |
| 26         | $\delta_{as}$ C(8)H <sub>3</sub> + $\delta_{as}$ C(9)H <sub>3</sub>                                     | 1455 w                    | 1451 sh          | 1504                             | 1444   | 1       | 3          |
| 27         | $\delta_{as}$ C(10)H <sub>3</sub>                                                                       | 1440 w                    | 1443 s           | 1500                             | 1440   | <1      | 3          |
| 28         | $\delta_{as}$ C(8)H <sub>3</sub> + $\delta_{as}$ C(9)H <sub>3</sub>                                     | -                         | -                | 1489                             | 1429   | <1      | 2          |
| 29         | $\delta_s$ C(2)H <sub>2</sub> + $\delta_{as}$ C(10)H <sub>3</sub>                                       | -                         | -                | 1488                             | 1429   | 2       | 3          |
| 30         | $\delta_s$ C(6)H <sub>2</sub> + $\delta_{as}$ C(10)H <sub>3</sub>                                       | -                         | -                | 1488                             | 1429   | 1       | 1          |
| 31         | $\delta_{as}$ C(8)H <sub>3</sub> + $\delta_{as}$ C(9)H <sub>3</sub> + $\delta_{as}$ C(10)H <sub>3</sub> | -                         | -                | 1481                             | 1422   | <1      | 2          |



|    |                                               |         |         |      |      |     |    |
|----|-----------------------------------------------|---------|---------|------|------|-----|----|
| 32 | $\delta_{as} C(12)H_3$                        | -       | -       | 1478 | 1419 | 2   | 3  |
| 33 | $\delta_{as} C(14)H_3$                        | -       | -       | 1476 | 1417 | 1   | 2  |
| 34 | $\delta_s C(2)H_2 + \delta_s C(6)H_2$         | -       | -       | 1474 | 1415 | <1  | 1  |
| 35 | $\omega C(14)H_3$                             | -       | -       | 1471 | 1412 | 3   | 3  |
| 36 | $\omega C(12)H_3$                             | -       | -       | 1471 | 1412 | 3   | 3  |
| 37 | $\delta C(3)H + \delta C(5)H$                 | -       | -       | 1451 | 1393 | 1   | 1  |
| 38 | $\delta C(5)H + \delta C(3)H$                 | -       | -       | 1428 | 1371 | <1  | 3  |
| 39 | $\delta_s C(8)H_3 + \delta_s C(9)H_3$         | -       | -       | 1424 | 1367 | 2   | <1 |
| 40 | $\delta_s C(10)H_3$                           | 1416 w  | 1414 m  | 1411 | 1354 | 2   | <1 |
| 41 | $\delta_s C(8)H_3 + \delta_s C(9)H_3$         | -       | -       | 1404 | 1348 | 3   | <1 |
| 42 | $\delta_s C(12)H_3 + \delta_s C(14)H_3$       | -       | -       | 1400 | 1344 | 5   | <1 |
| 43 | $\delta_s C(14)H_3 + \delta_s C(12)H_3$       | 1390 sh | 1389 m  | 1398 | 1342 | 16  | <1 |
| 44 | $\delta C(3)H + \delta C(4)H + \delta C(5)H$  | 1376 m  | 1380 m  | 1387 | 1332 | 4   | 1  |
| 45 | $\delta CH_2 + \delta CH$                     | 1364 s  | 1361 m  | 1363 | 1308 | 1   | <1 |
| 46 | $\delta CH_2 + \delta CH$                     | 1336 vw | 1335 vw | 1340 | 1286 | <1  | 1  |
| 47 | $\delta CH_2 + \delta CH$                     | 1316 s  | 1315 m  | 1314 | 1261 | 2   | 2  |
| 48 | $\delta CH_2 + \delta CH$                     | -       | -       | 1309 | 1257 | 1   | 4  |
| 49 | $\omega C(10)H_3$                             | 1286 sh | 1283 m  | 1277 | 1226 | 13  | 2  |
| 50 | $\tau\omega C(2)H_2 + \tau\omega C(6)H_2$     | -       | -       | 1266 | 1215 | 5   | <1 |
| 51 | $\nu C(11)O(3) + \nu CC \text{ ring}$         | 1253 vs | 1261 w  | 1260 | 1210 | 42  | 1  |
| 52 | $\nu C(13)O(4) + \nu CC \text{ ring}$         | 1241 vs | 1246 m  | 1252 | 1202 | 44  | 1  |
| 53 | $\nu CC \text{ ring}$                         | -       | -       | 1246 | 1196 | 5   | 1  |
| 54 | $\delta CH_3 + \nu CC \text{ ring}$           | 1223 vs | 1220 m  | 1241 | 1191 | 100 | 2  |
| 55 | $\nu C-CH_3$                                  | -       | -       | 1199 | 1151 | 2   | <1 |
| 56 | $\delta CH_3 + \delta CH_2$                   | 1187 sh | 1186 w  | 1198 | 1150 | 9   | 1  |
| 57 | $\delta CH_3 + \delta CH_2$                   | 1179 m  | 1179 w  | 1186 | 1139 | <1  | 3  |
| 58 | $\tau\omega C(6)H_2 + \tau\omega C(2)H_2$     | -       | 1167 m  | 1167 | 1120 | 6   | 1  |
| 59 | $\nu CC \text{ ring}$                         | 1149 m  | 1149 w  | 1137 | 1092 | 8   | 1  |
| 60 | $\nu CCC$                                     | 1125 m  | 1121 m  | 1107 | 1063 | 11  | 1  |
| 61 | $\nu_{as} C(1)O(1)C(7)$                       | 1092 m  | 1090 s  | 1070 | 1027 | 2   | 2  |
| 62 | $\delta CCO$                                  | -       | 1064 w  | 1067 | 1024 | 11  | 1  |
| 63 | $\tau\omega C(14)H_3$                         | -       | -       | 1065 | 1022 | 1   | <1 |
| 64 | $\tau\omega C(12)H_3$                         | 1052 m  | 1051 w  | 1065 | 1022 | 1   | 1  |
| 65 | $\nu C(11)O(2) + \nu C(13)O(4)$               | -       | 1034 vw | 1039 | 997  | 45  | 1  |
| 66 | $\nu CC \text{ ring} + \nu_{as} C(1)O(1)C(7)$ | 1027 m  | 1026 sh | 1028 | 987  | 8   | 1  |
| 67 | $\tau\omega C(8)H_3 + \tau\omega C(9)H_3$     | 1015 m  | 1015 s  | 1020 | 979  | 1   | 1  |
| 68 | $\nu CC \text{ ring}$                         | -       | -       | 1014 | 973  | 4   | 1  |
| 69 | $\nu CC \text{ ring} + \omega C(10)H_3$       | -       | 1002 sh | 995  | 955  | 2   | 1  |
| 70 | $\nu CC \text{ ring} + \nu_{as} C(1)O(1)C(7)$ | 986 m   | 985 s   | 988  | 948  | 9   | 3  |
| 71 | $\rho C(10)H_3 + \rho C(2)H_2$                | 967 m   | 967 w   | 976  | 937  | 9   | <1 |

|     |                                                       |        |        |     |     |    |    |
|-----|-------------------------------------------------------|--------|--------|-----|-----|----|----|
| 72  | $\rho$ C(8)H <sub>3</sub> + $\rho$ C(9)H <sub>3</sub> | -      | -      | 942 | 904 | 2  | 3  |
| 73  | $\rho$ C(9)H <sub>3</sub> + $\rho$ C(8)H <sub>3</sub> | 934 w  | 934 m  | 937 | 900 | 1  | 2  |
| 74  | $\delta$ CCH ring                                     | 924 m  | 924 s  | 929 | 892 | 3  | 6  |
| 75  | $\delta$ CCH ring                                     | 909 vw | -      | 914 | 877 | 1  | <1 |
| 76  | $\nu$ CC ring                                         | 902 sh | 902 m  | 906 | 870 | <1 | 1  |
| 77  | $\nu$ CCC                                             | 888 w  | 888 m  | 893 | 857 | <1 | 1  |
| 78  | $\rho$ C(2)H <sub>2</sub> + $\rho$ C(6)H <sub>2</sub> | 862 m  | 861 w  | 863 | 828 | 1  | <1 |
| 79  | $\rho$ C(6)H <sub>2</sub> + $\rho$ C(2)H <sub>2</sub> | -      | -      | 842 | 808 | 1  | 1  |
| 80  | $\nu_s$ C(1)O(1)C(7)                                  | 840 m  | 838 m  | 837 | 804 | 3  | 1  |
| 81  | $\nu$ CCC ring                                        | 791 vw | 791 vw | 791 | 759 | <1 | <1 |
| 82  | $\delta$ CCH ring                                     | -      | 708 w  | 709 | 681 | <1 | 1  |
| 83  | $\delta$ CCH ring + $\delta$ C(3)O(2)C(11)            | 680 w  | 681 m  | 684 | 657 | 1  | 1  |
| 84  | $\delta$ O(2)C(11)O(3)                                | 632 m  | 633 s  | 632 | 607 | 3  | 3  |
| 85  | $\omega$ C(13)O(5)                                    | 617 m  | 617 s  | 619 | 594 | 2  | 1  |
| 86  | $\rho$ C(14)H <sub>3</sub>                            | -      | -      | 608 | 584 | 1  | 3  |
| 87  | $\omega$ C(11)O(3)                                    | 604 m  | 605 ws | 602 | 578 | 1  | 1  |
| 88  | $\delta$ C(10)C(1)O(1)                                | 548 w  | 548 m  | 546 | 524 | <1 | 2  |
| 89  | $\delta$ O(5)C(13)C(14) + $\delta$ CCC ring           | 525 m  | 525 w  | 528 | 507 | 1  | 1  |
| 90  | $\delta$ CCO ring                                     | 509 m  | -      | 515 | 494 | 1  | <1 |
| 91  | $\delta$ CCC ring                                     | 500 m  | 500 m  | 502 | 482 | 1  | 2  |
| 92  | $\delta$ CCC ring                                     | 464 sh | 466 w  | 465 | 446 | 1  | <1 |
| 93  | $\delta$ CCO ring                                     | 456 m  | 458 vw | 453 | 435 | 2  | <1 |
| 94  | $\delta$ CCC ring                                     | 442 w  | 442 w  | 439 | 421 | <1 | <1 |
| 95  | $\delta$ C(4)C(7)C(9)                                 | 418 w  | 418 m  | 420 | 403 | <1 | <1 |
| 96  | $\delta$ CCC ring                                     | -      | 402 m  | 404 | 388 | <1 | <1 |
| 97  | $\delta$ CCC ring                                     | -      | 371 m  | 359 | 345 | <1 | 1  |
| 98  | $\tau$ CC ring                                        | -      | -      | 304 | 292 | 1  | <1 |
| 99  | $\tau$ CC ring + $\tau$ CH <sub>3</sub>               | -      | 296 sh | 290 | 278 | <1 | <1 |
| 100 | $\delta$ CCC ring                                     | -      | 281 w  | 275 | 264 | <1 | <1 |
| 101 | $\tau$ CC ring + $\tau$ CH <sub>3</sub>               | -      | -      | 272 | 261 | <1 | 1  |
| 102 | $\tau$ CC ring                                        | -      | 252 w  | 251 | 241 | <1 | <1 |
| 103 | $\tau$ C(9)H <sub>3</sub> + $\tau$ C(8)H <sub>3</sub> | -      | 239 w  | 241 | 231 | <1 | <1 |
| 104 | $\tau$ C(8)H <sub>3</sub> + $\tau$ C(9)H <sub>3</sub> | -      | -      | 236 | 227 | 1  | <1 |
| 105 | $\tau$ CH <sub>3</sub>                                | -      | -      | 222 | 213 | 1  | <1 |
| 106 | $\tau$ C(10)H <sub>3</sub>                            | -      | -      | 219 | 210 | <1 | <1 |
| 107 | $\tau$ CC ring + $\tau$ CH <sub>3</sub>               | -      | -      | 207 | 199 | <1 | <1 |
| 108 | $\tau$ CH <sub>3</sub>                                | -      | -      | 191 | 183 | <1 | <1 |
| 109 | $\tau$ skeletal                                       | -      | 140 vw | 121 | 116 | <1 | <1 |
| 110 | $\tau$ skeletal                                       | -      | 103 sh | 94  | 90  | <1 | <1 |
| 111 | $\tau$ CC ring                                        | -      | 71 m   | 78  | 75  | <1 | <1 |
| 112 | $\tau$ CC ring                                        | -      | -      | 75  | 72  | 1  | <1 |

|     |                            |   |   |    |    |    |    |
|-----|----------------------------|---|---|----|----|----|----|
| 113 | $\tau$ skeletal            | - | - | 55 | 53 | 1  | <1 |
| 114 | $\tau$ C(14)H <sub>3</sub> | - | - | 48 | 46 | <1 | <1 |
| 115 | $\tau$ C(5)O(4)            | - | - | 42 | 40 | <1 | <1 |
| 116 | $\tau$ C(12)H <sub>3</sub> | - | - | 39 | 37 | <1 | <1 |
| 117 | $\tau$ skeletal +          | - | - | 34 | 33 | <1 | <1 |

<sup>a</sup> Main contributors to fundamental vibrational modes.  $\nu$ : stretching;  $\delta$ : bending;  $\rho$ : rocking;  $\omega$ : wagging;  $\tau\omega$ : twisting;  $\tau$ : torsional modes; s: symmetric; as: asymmetric.

<sup>b</sup> s: strong; vs: very strong; m: medium; w: weak; vw: very weak; sh: shoulder.

<sup>c</sup> Shaded columns show the best correlation with experimental frequencies observed. Higher frequency values were scaled with 0.9676 factor [Ref. 55]. Relative infrared intensities and Raman activities were normalized to 100%.
